# Supplementary material for: High-permeance metal–organic framework-based membrane adsorber for the removal of dye molecules in aqueous phase
Source: Royal Society of Chemistry journal article supplement (doi:10.1039/c7en00639j), 2017-01-01
Supplement: c7en00639j1.pdf [file c7en00639j1.pdf]

*Electronic Supplementary Information for*

# **High-permeance metal-organic framework-based membrane adsorber for removal of dye molecules in aqueous phase**

Hsiang Ting,<sup>‡</sup> Heng-Yu Chi,<sup>‡</sup> Chon Hei Lam, Kuan-Ying Chan, and Dun-Yen Kang\*

<sup>‡</sup> Authors contributed equally

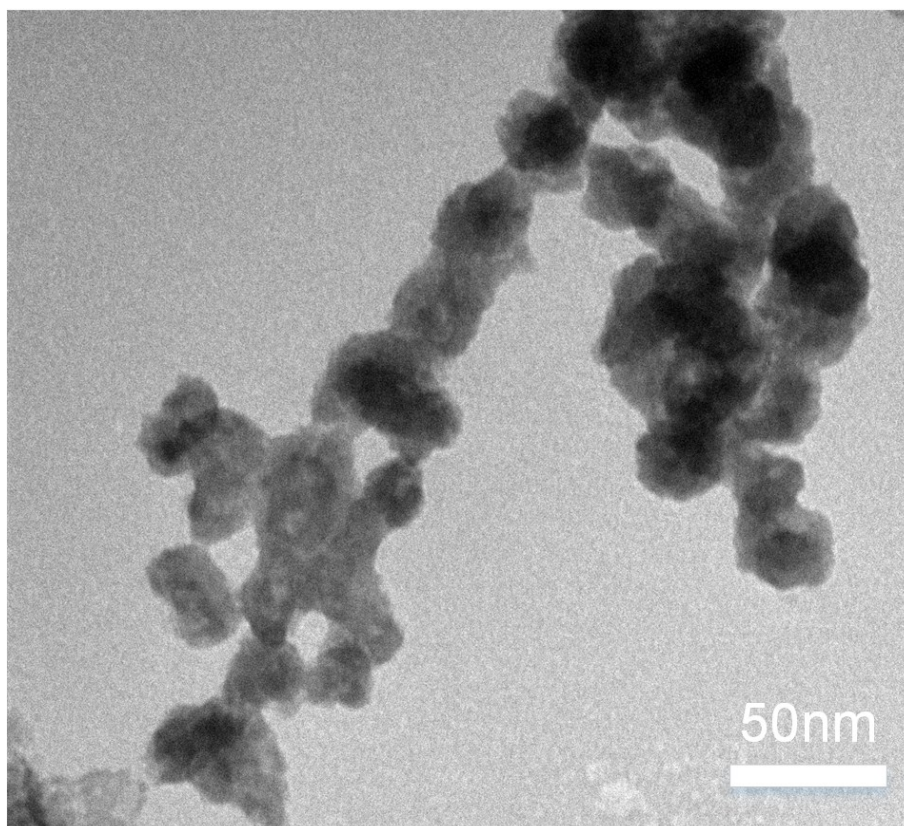

**Fig. S1** TEM image of ZIF-L (CTAB, 8X).

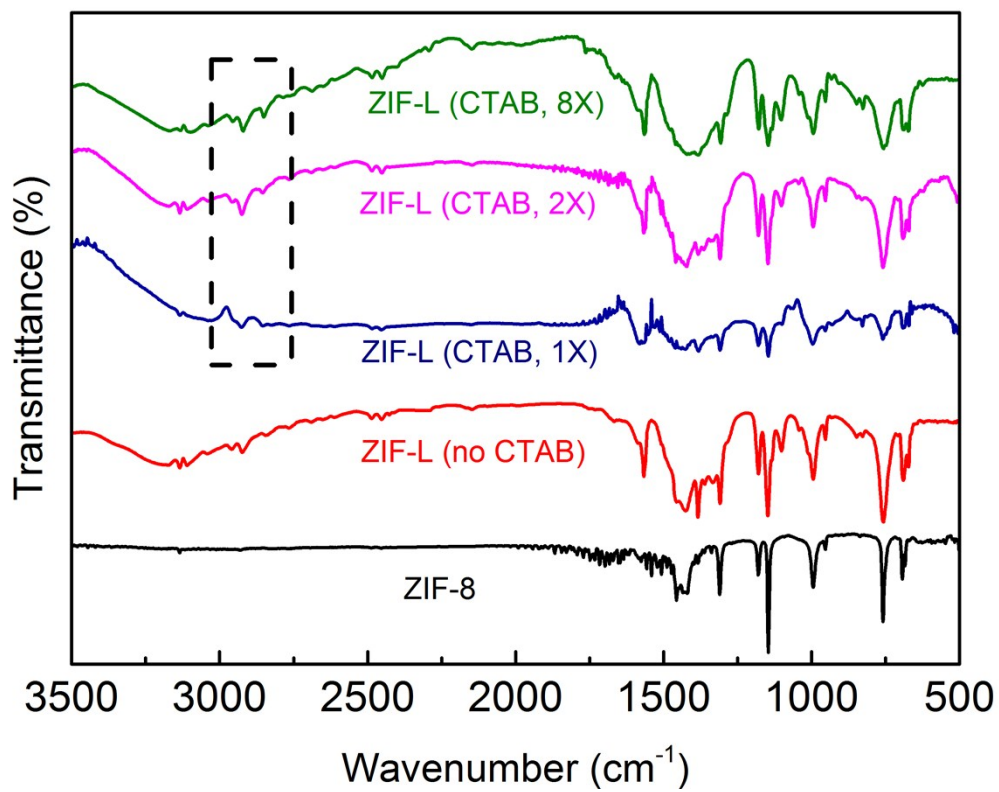

**Fig. S2** FTIR spectra of powder sample of ZIF-8, ZIF-L (no CTAB), ZIF-L (CTAB, 1X), ZIF-L (CTAB, 2X), and ZIF-L (CTAB, 8X). Dashed box highlights absorption of CTAB.

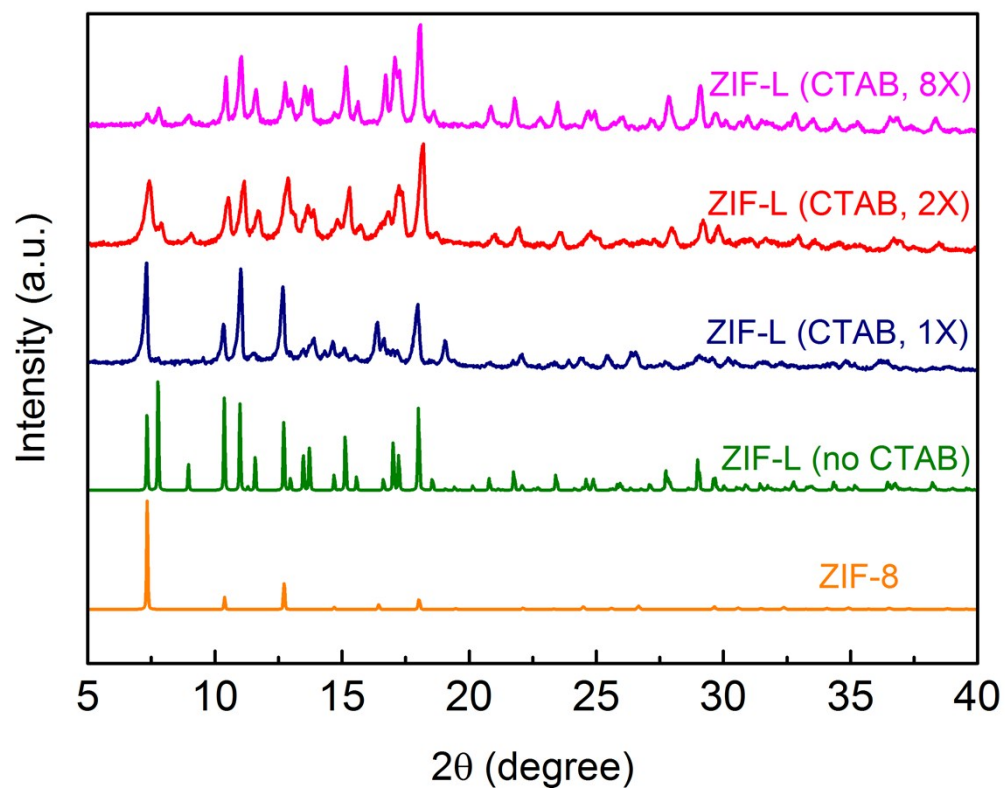

**Fig. S3** Powder XRD patterns of ZIF-8, ZIF-L (no CTAB), ZIF-L (CTAB, 1X), ZIF-L (CTAB, 2X), and ZIF-L (CTAB, 8X).

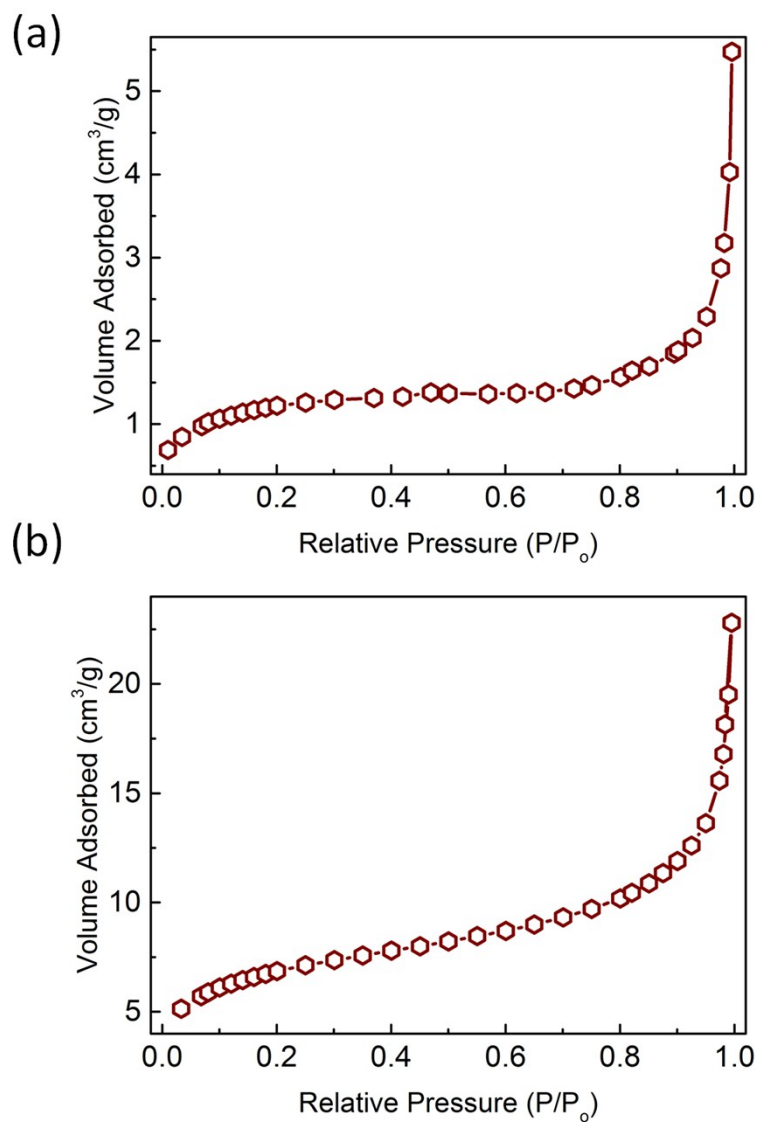

**Fig. S4** Nitrogen adsorption isotherms of (a) ZIF-L (CTAB, 1X) and (b) ZIF-L (CTAB, 2X). The derived BET surface areas of ZIF-L (CTAB, 1X) and ZIF-L (CTAB, 2X) are 4.4 and 24.2 m<sup>2</sup>/g respectively.
